# Supplementary material
Source: Springer Nature journal article supplement (https://www.springermedizin.de/resource/supplementary/12879_2008_818_MOESM1_ESM.pdf/9449850)
Supplement: MOESM1 [file 9449850]

**388 Consecutive HIV-Infected  
TB Suspects**

**59 (15%) Smear Result Unavailable**

39 (10%) Sputum not submitted

20 (5%) Sputum not concentrated

**329 Initial Cultures Evaluated**

**50 (13%) Culture Result Unavailable**

48 (12%) Contaminated

2 (1%) Not performed

**279 Patients with Culture Results**

170 (61%) Culture-positive

109 (39%) Culture-negative

26 (24%) Improved on TB therapy
